# Supplementary material
Source: PubMed Central journal article supplement (PMC2992292)

# Plasticity of Cytochrome P450 2B4 as Investigated by Hydrogen-Deuterium Exchange Mass Spectrometry and X-Ray Crystallography\*<sup>S</sup>

P. Ross Wilderman<sup>1§</sup>, Manish B. Shah<sup>1§</sup>, Tong Liu<sup>2</sup>, Sheng Li<sup>2</sup>, Simon Hsu<sup>2</sup>, Arthur G. Roberts<sup>1</sup>, David R. Goodlett<sup>3</sup>, Qinghai Zhang<sup>4</sup>, Virgil L. Woods Jr.<sup>2</sup>, C. David Stout<sup>4</sup>, and James R. Halpert<sup>1</sup>

<sup>1</sup>Skaggs School of Pharmacy and Pharmaceutical Sciences, University of California, San Diego, La Jolla, CA 92093; The <sup>2</sup>Department of Medicine, University of California, San Diego, La Jolla, CA 92093; The <sup>3</sup>Department of Medicinal Chemistry, University of Washington, Seattle, WA 98195; and The <sup>4</sup>Department of Molecular Biology, The Scripps Research Institute, La Jolla, CA 92037.

## SUPPLEMENTAL EXPERIMENTAL DATA

**Figure S1.** UV-visible spectroscopy of ligand-free P450 2B4dH in A) solution and B) crystal. Because of strong absorbance in the Soret region 350-500 nm, only the  $\alpha$  and  $\beta$  absorbance bands are shown. Experiments were completed in the buffer used for crystallization of P450 2B4dH containing 50 mM potassium phosphate (pH 7.4 at 4°C), 500 mM NaCl, 1 mM EDTA, 20% (v/v) glycerol and 0.2 mM DTT. The addition of CYMAL-5 did not change the absorbance spectra in panel A significantly (data not shown).

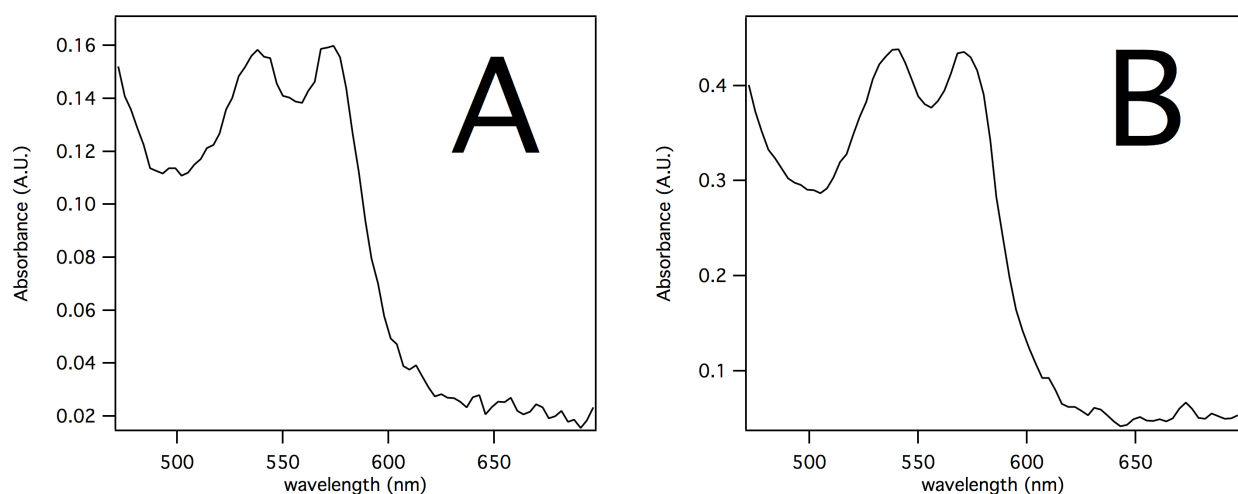

Figure S2. Comparison of the open ligand-free structure and ligand-bound structures of P450 2B4dH. Overlay of open structure (green), 4-CPI-bound structure (purple), and 1-PBI-bound structure (yellow) shows relative differences among plastic regions of the enzyme.

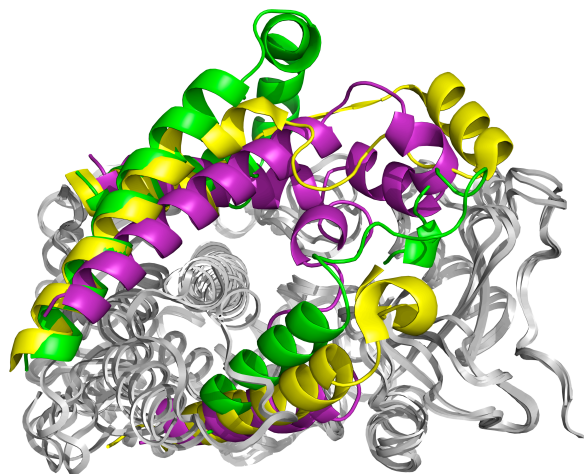

Supplement: supp_M110.180646_jbc.M110.180646-1.pdf [file supp_M110.180646_jbc.M110.180646-1.pdf]
